# Supplementary material
Source: PubMed Central journal article supplement (PMC4075437)

A

banana

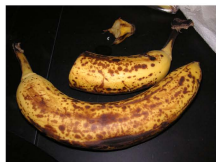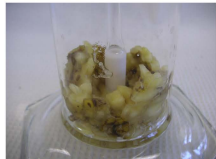

B

study 1

study 2

study 3

average

orientation

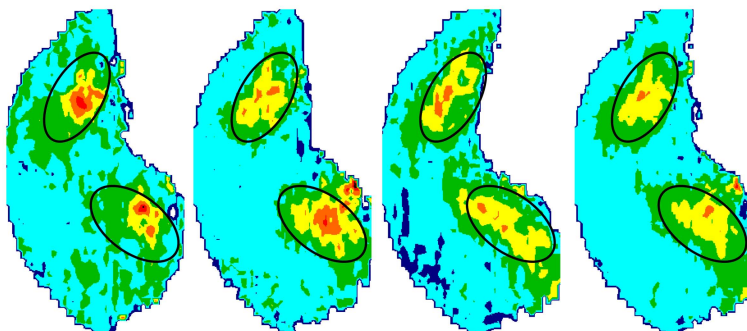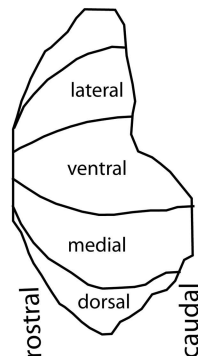

C

Major volatile components

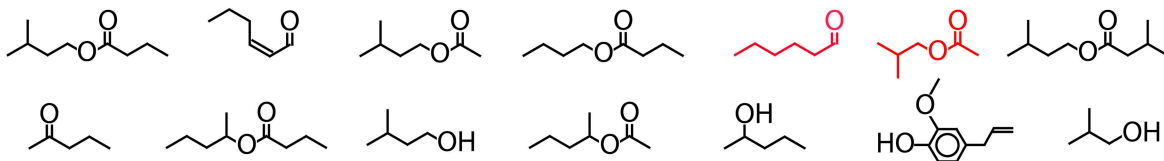

D

Odorants in archive giving highest correlations

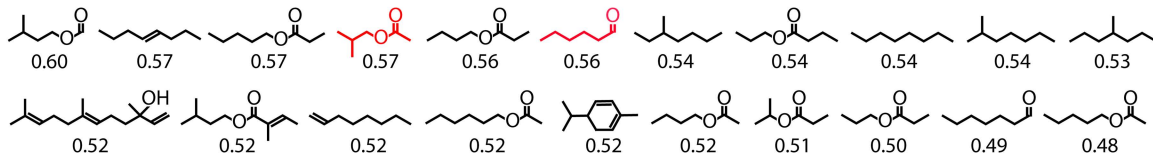

E

Patterns evoked by components in archive

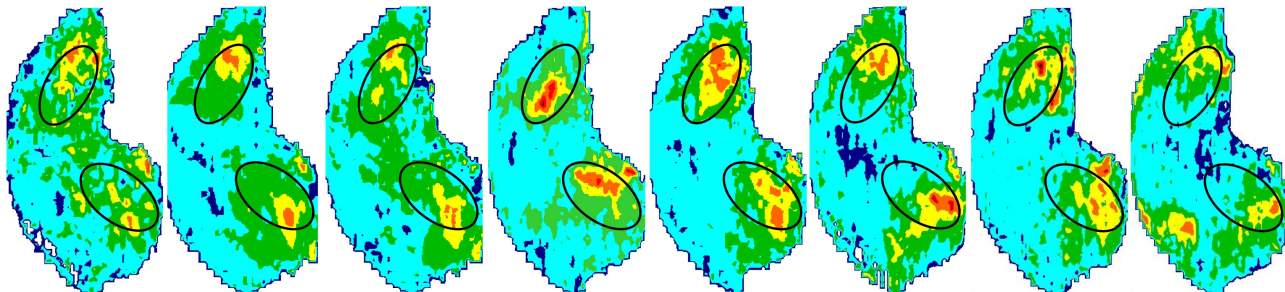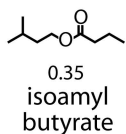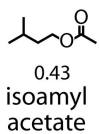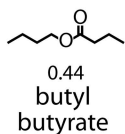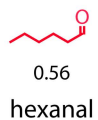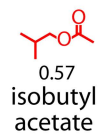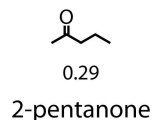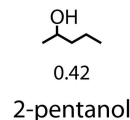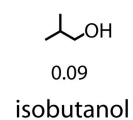

**A** apple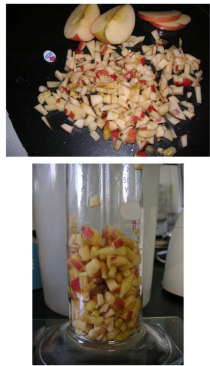**B**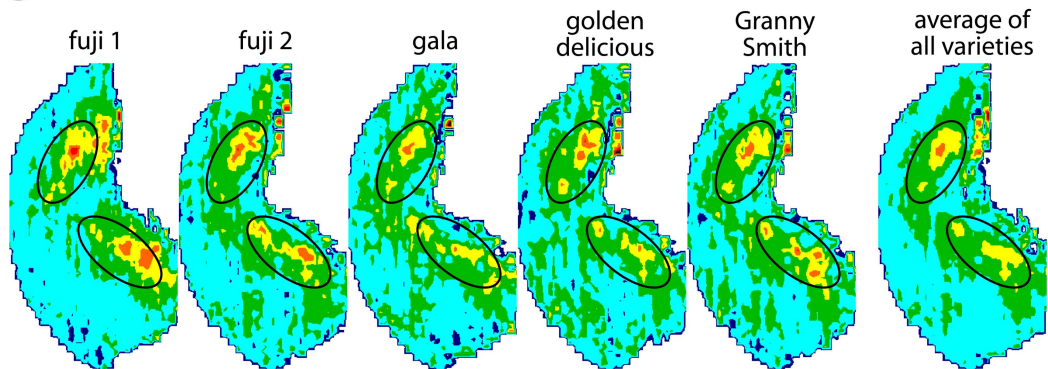**C**

Major volatile components

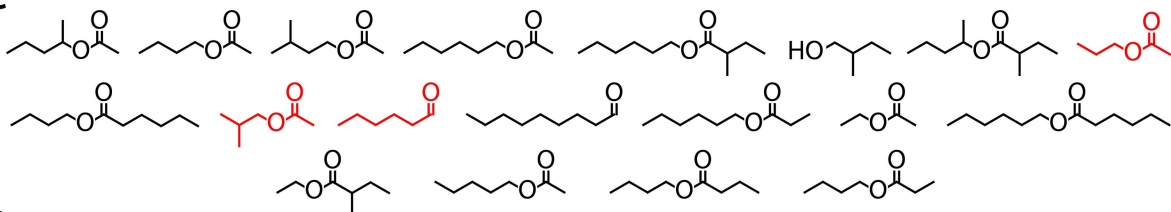**D**

Odorants in archive giving highest correlations

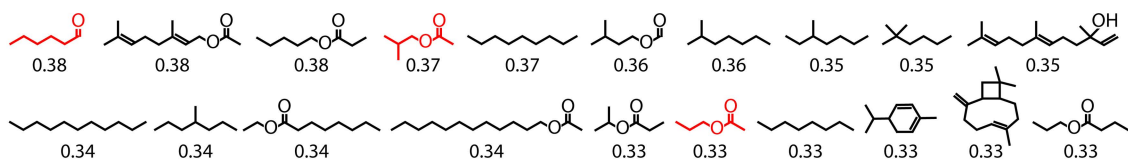**E**

Patterns evoked by components in archive

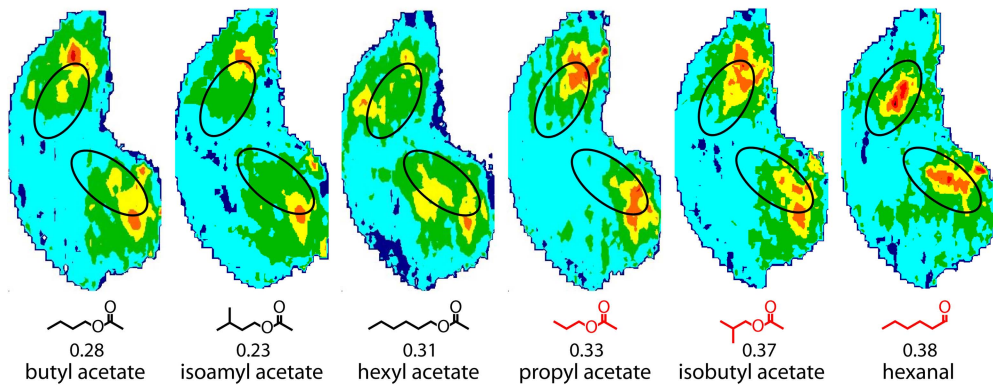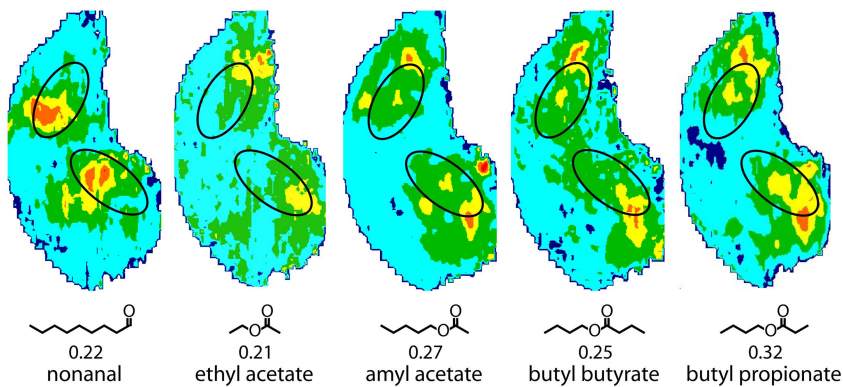

# A strawberry

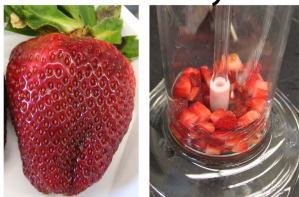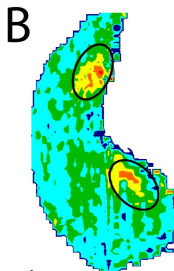

# C Major volatile components

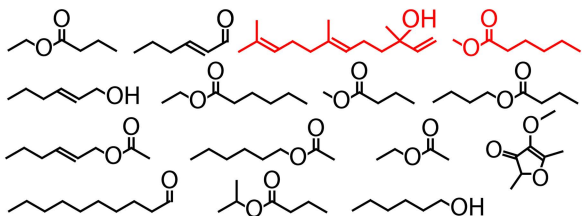

# D Odorants in archive giving highest correlations

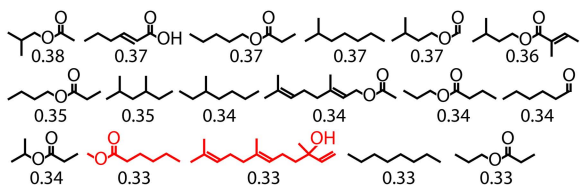

# E Patterns evoked by components in archive

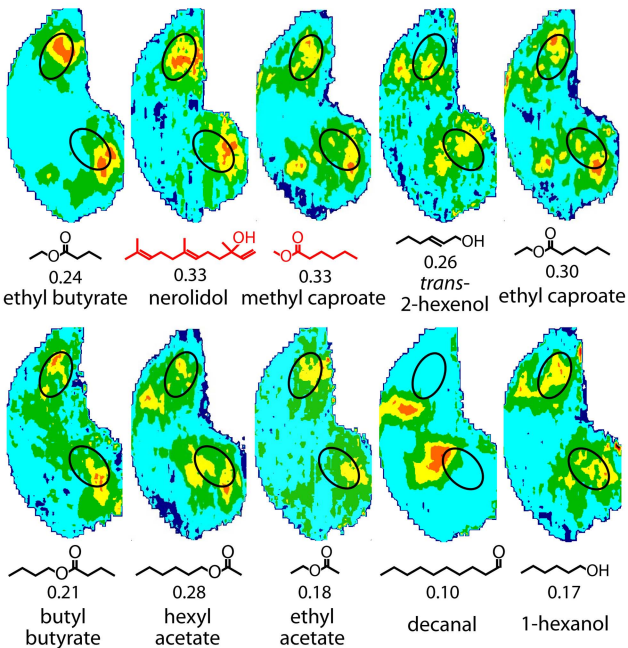

**A**

pineapple

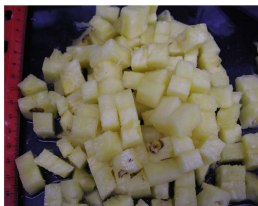**B**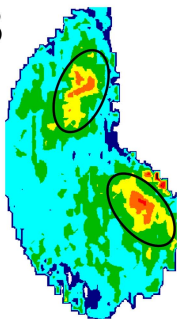**C**

Major volatile components

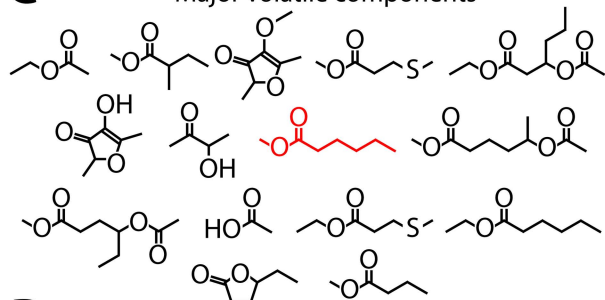**D**

Odorants in archive giving highest correlations

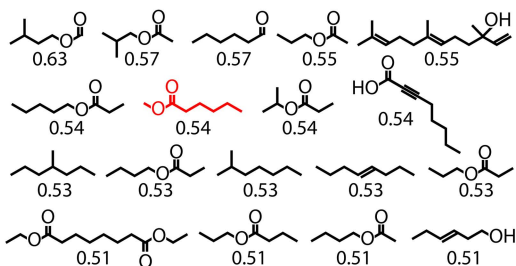**E**

Patterns evoked by components in archive

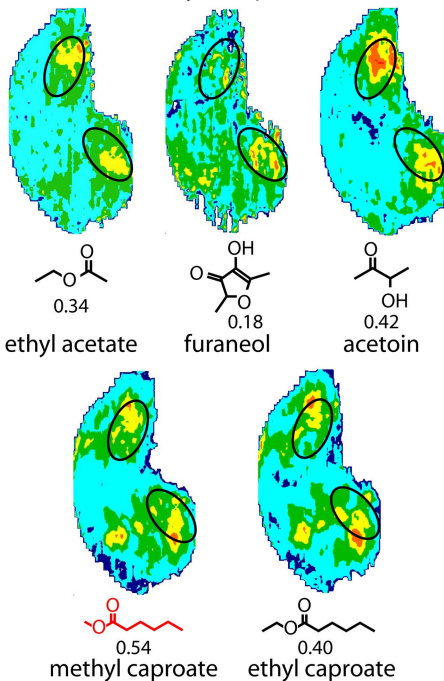



# A garlic

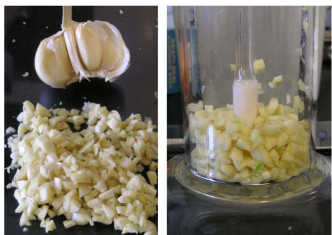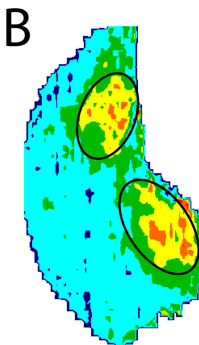

# C Major volatile components

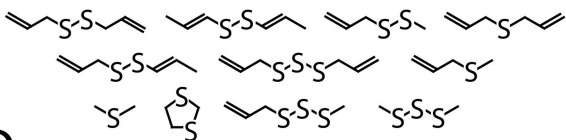

# D Odorants in archive giving highest correlations

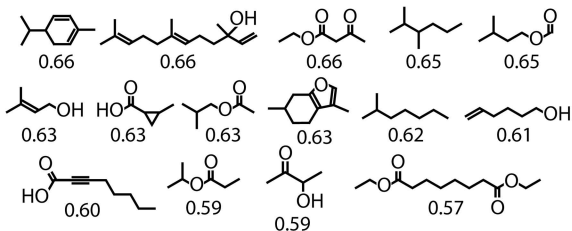

# E Patterns evoked by odorants related to major components

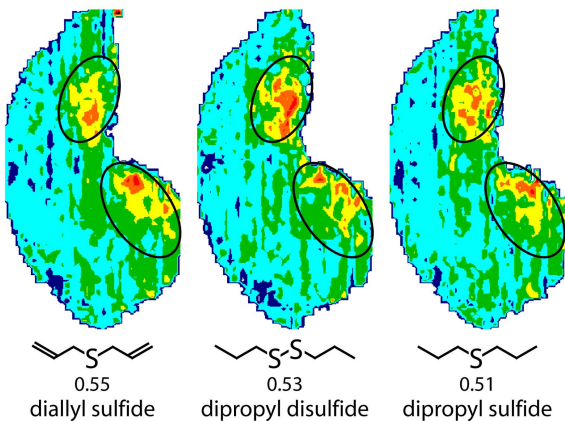

A

cinnamon bark

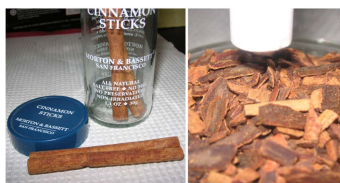

B

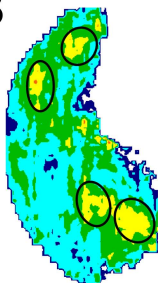

C

Major volatile components

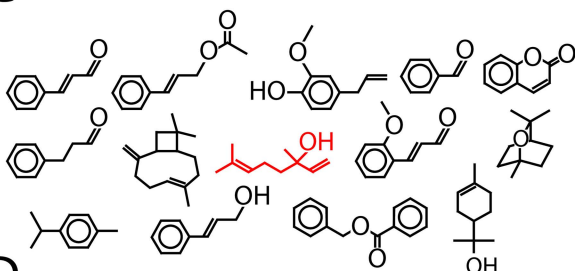

D

Odorants in archive giving highest correlations

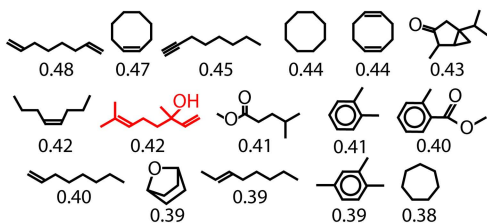

E

Patterns evoked by components in archive

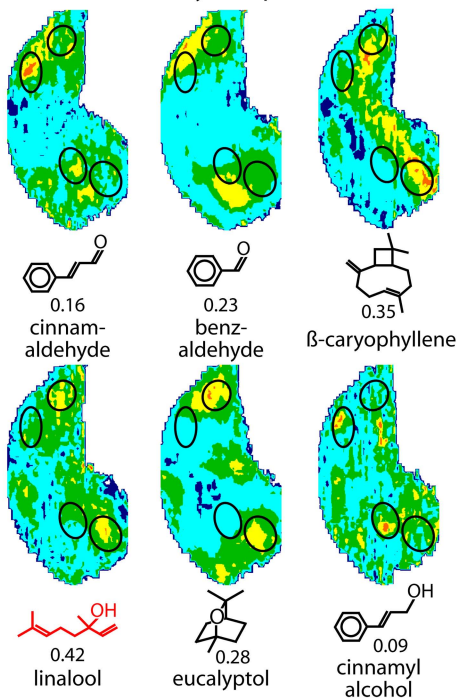

# A eucalyptus leaves

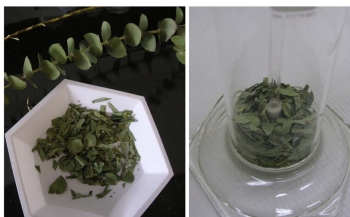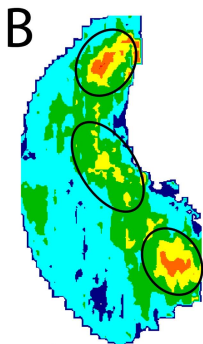

# C Major volatile components

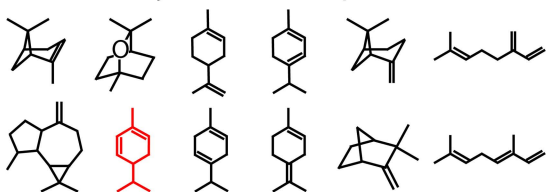

# D Odorants in archive giving highest correlations

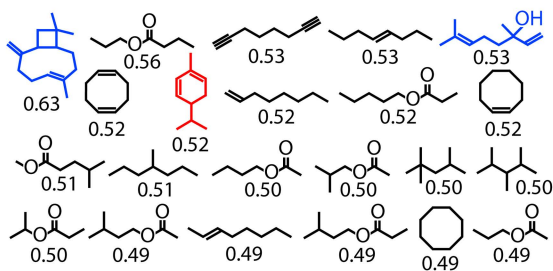

# E Patterns evoked by components in archive

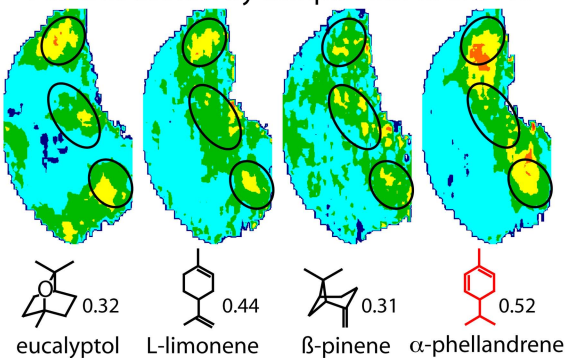

**A**

pine needles

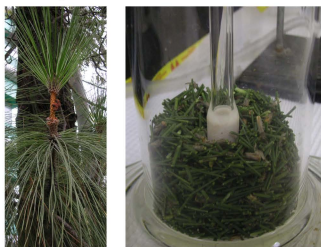**B**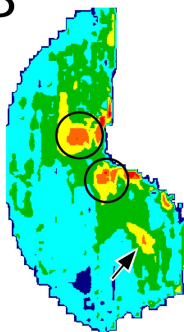**C**

Major volatile components

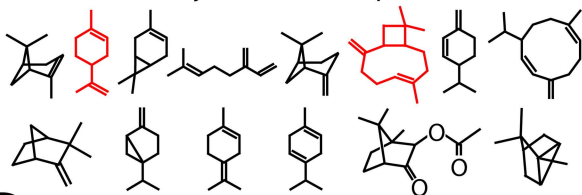**D**

Odorants in archive giving highest correlations

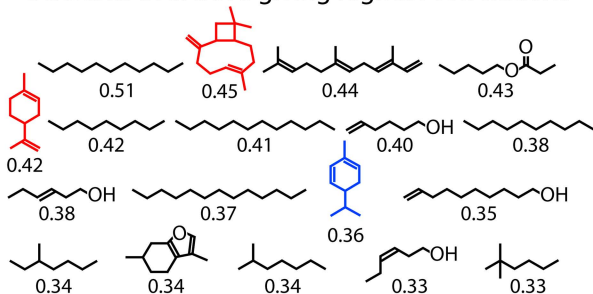**E**

Patterns evoked by components in archive

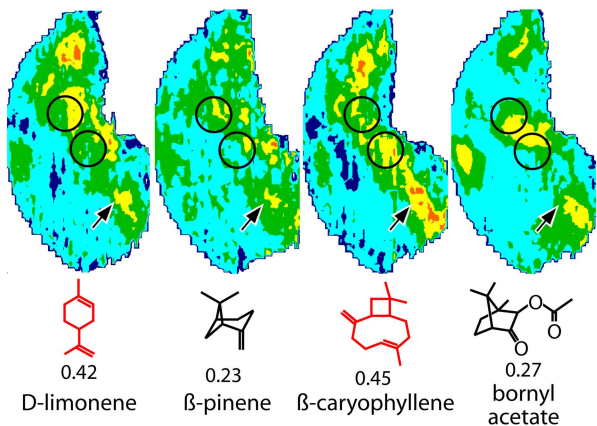



# A cedarwood

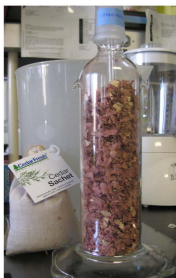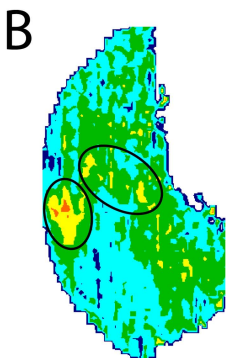

# C Major volatile components

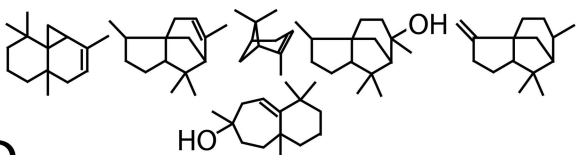

# D Odorants in archive giving highest correlations

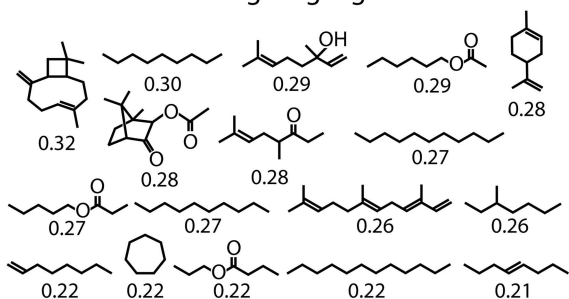

# E Patterns evoked by odorants related to major components

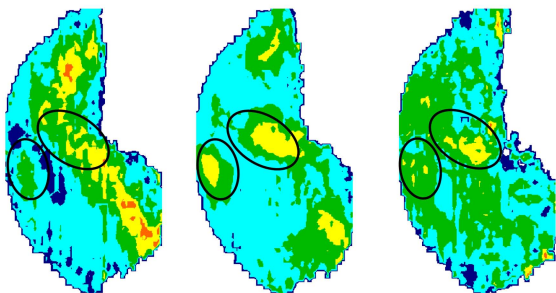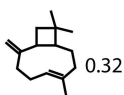

$\beta$ -caryophyllene

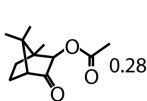

bornyl acetate

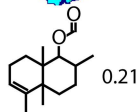

oxyoctaline formate

**A**

celery

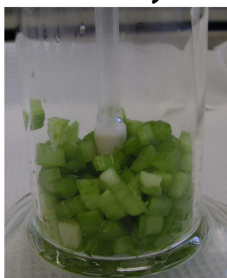**B**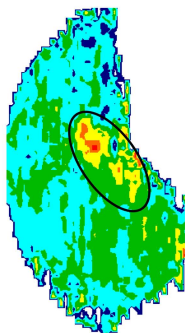**C**

Major volatile components

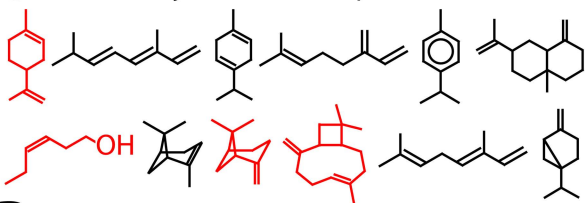**D**

Odorants in archive giving highest correlations

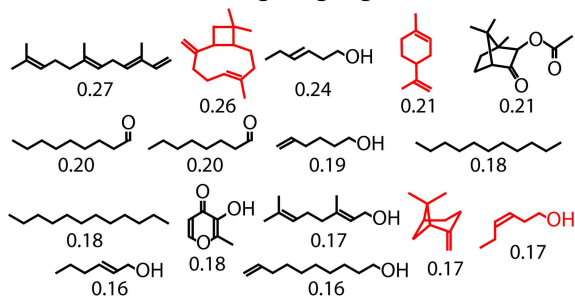**E**

Patterns evoked by components in archive

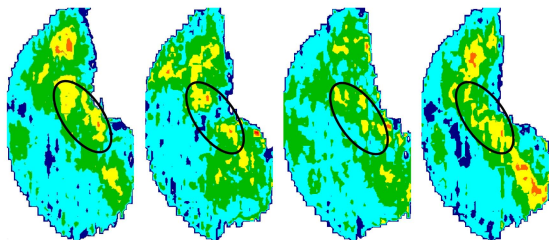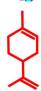

0.21

D-limonene

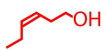

0.17

cis-3-hexen-1-ol

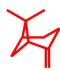

0.17

β-pinene

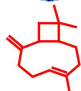

0.26

β-caryophyllene

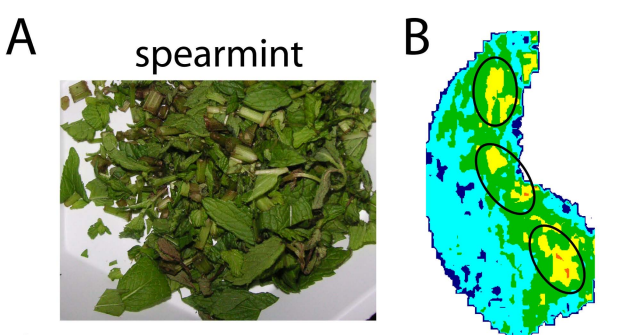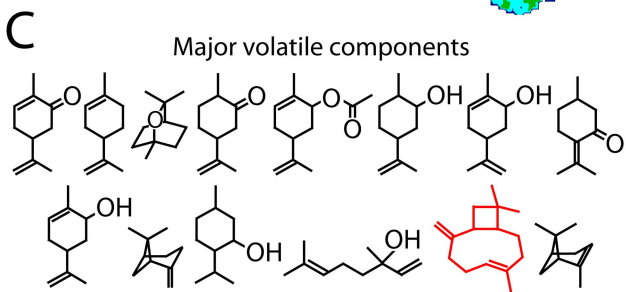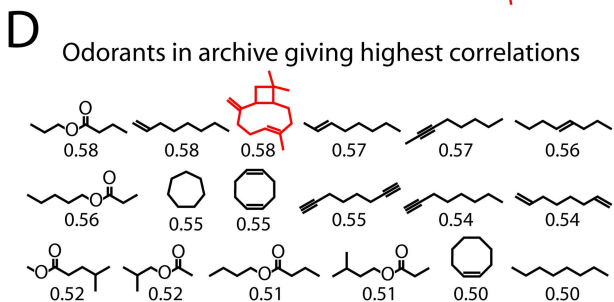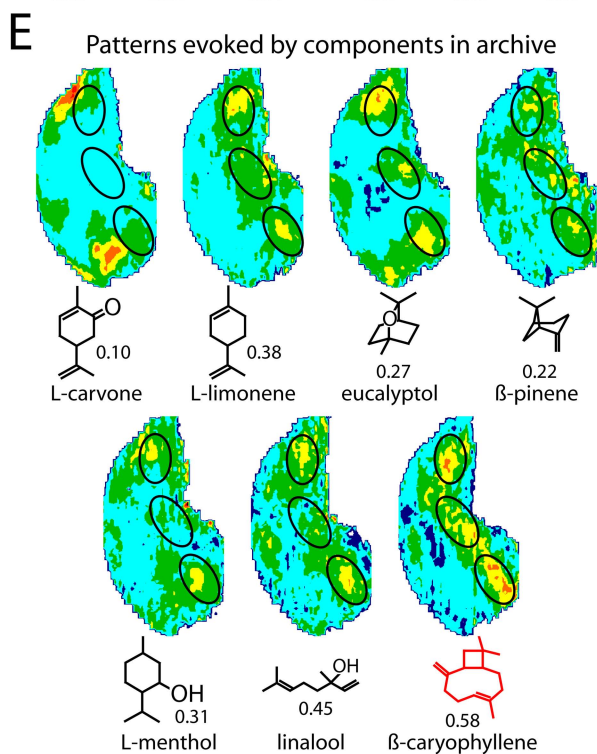

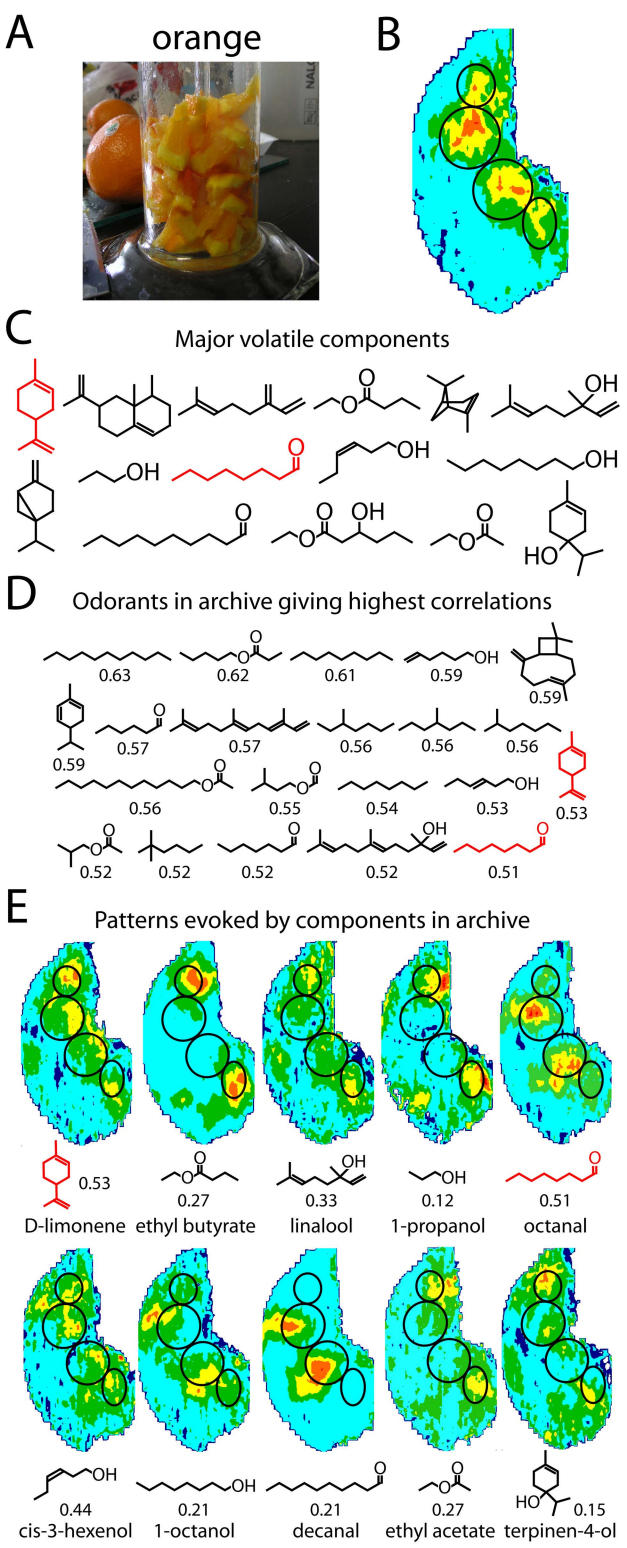



**A**

peanut butter

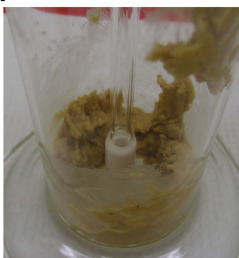**B**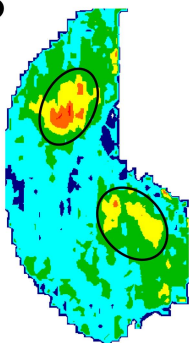**C**

Major volatile components

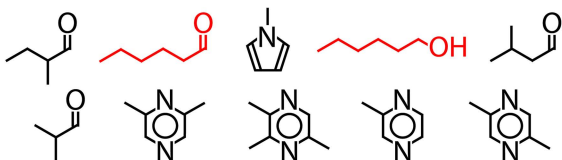**D**

Odorants in archive giving highest correlations

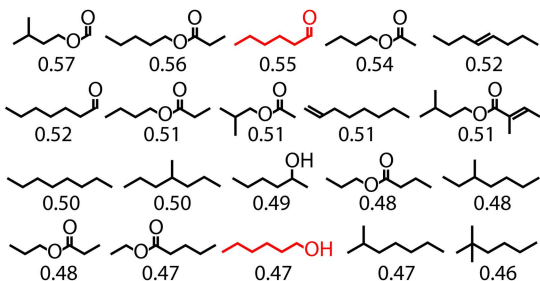**E**

Patterns evoked by components in archive

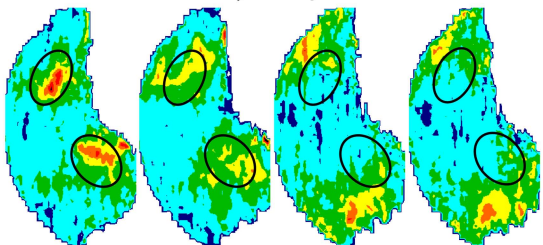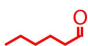

0.55

hexanal

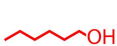

0.47

1-hexanol

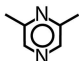

0.17

2,6-dimethyl-  
pyrazine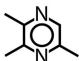

0.13

2,3,5-tri-  
methylpyrazine

# A wheat bran

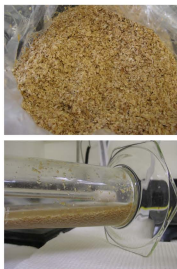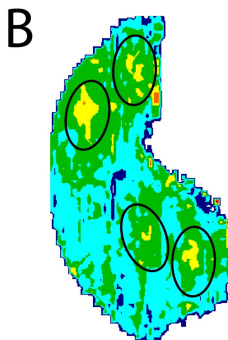

# C Major volatile components

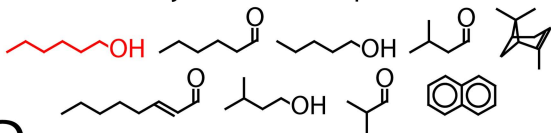

# D Odorants in archive giving highest correlations

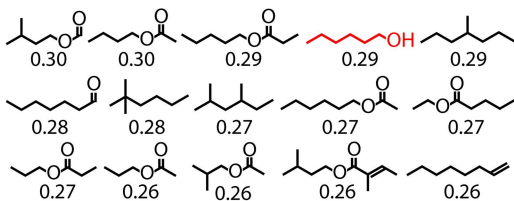

# E Patterns evoked by components in archive

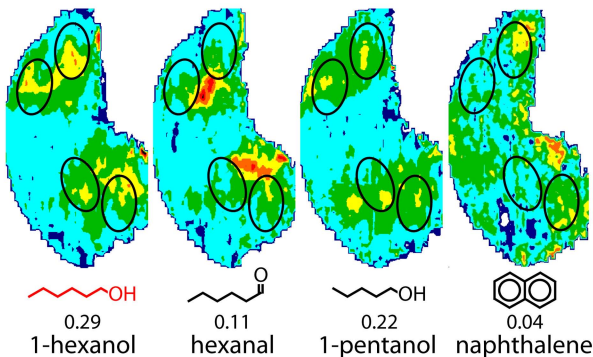

**A** tomato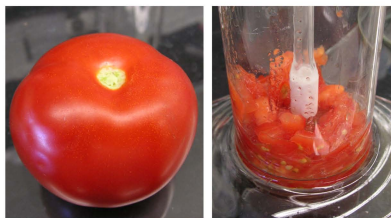**B**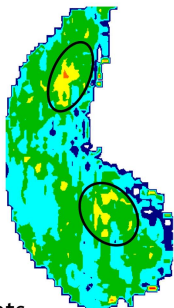**C** Major volatile components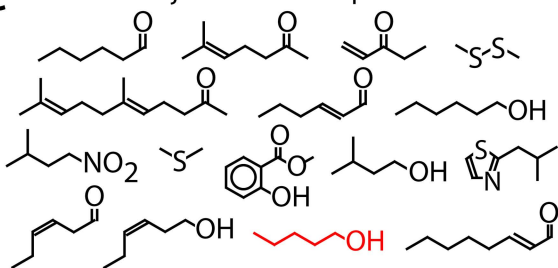**D** Odorants in archive giving highest correlations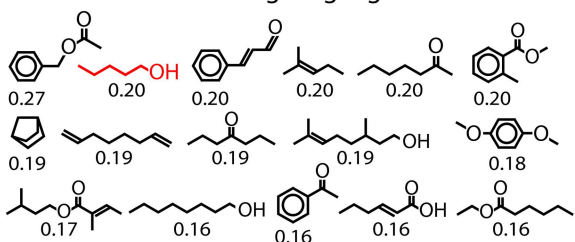**E** Patterns evoked by components in archive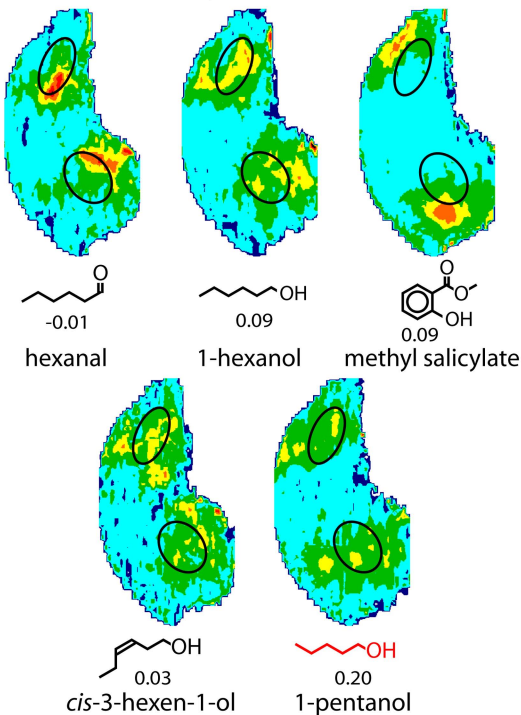

**A**

grass

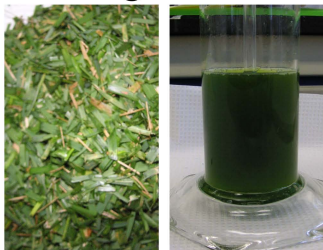**B**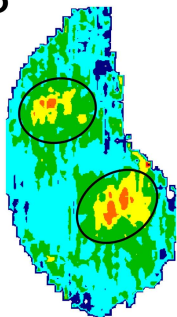**C**

Major volatile components

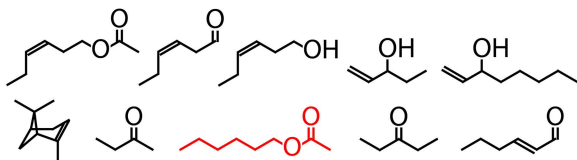**D**

Odorants in archive giving highest correlations

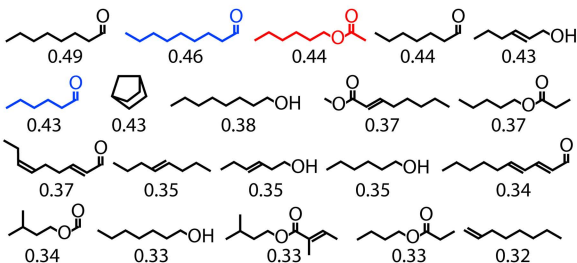**E**

Patterns evoked by components in archive

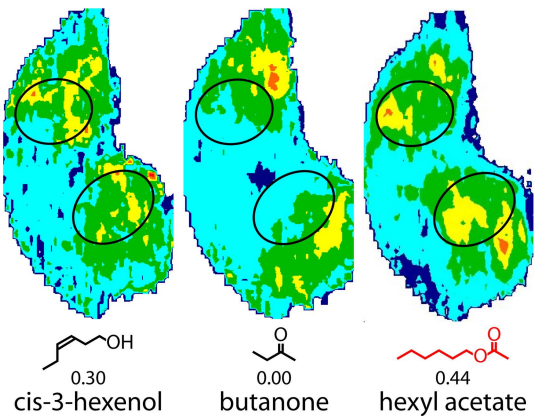

Supplement: NIHMS531163-supplement-Supp_Fig_S1-S16.pdf [file NIHMS531163-supplement-Supp_Fig_S1-S16.pdf]
